# Supplementary material
Source: PubMed Central journal article supplement (PMC6697195)
Supplement: NIHMS1533155-supplement-1.pdf [file NIHMS1533155-supplement-1.pdf]

**1f**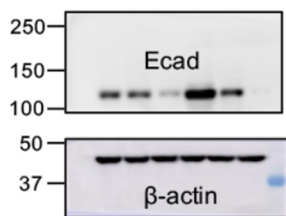

$\beta$ -actin, loading control, same gel as Ecad.

**2a**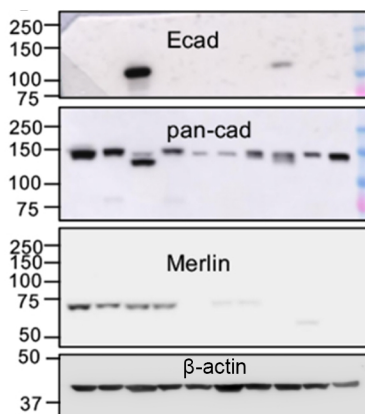

$\beta$ -actin, technical control. All four proteins were blotted using the same samples run on separate gels.

**2f**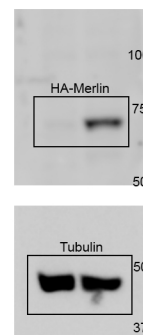

Tubulin, loading control, same gel as HA-Merlin.

**3e**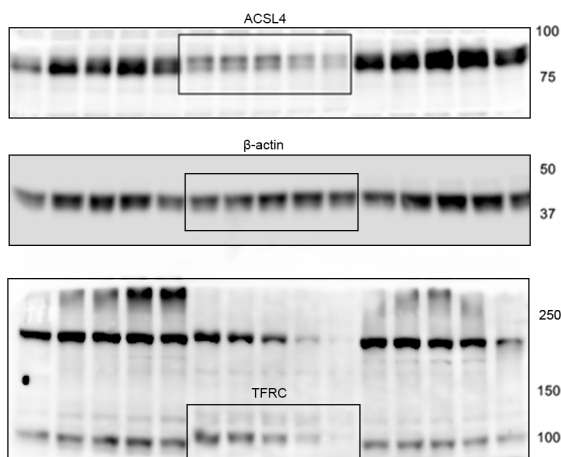

$\beta$ -actin, loading control run on the same gel as ACSL4; the same samples were blotted for TFRC on a separate gel.

**3f**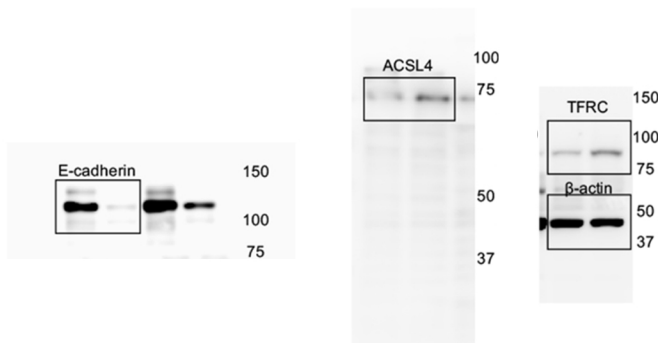

$\beta$ -actin, loading control run on the same gel as TFRC; the same samples were blotted on separate gels for ACSL4 and E-cadherin.

**3g**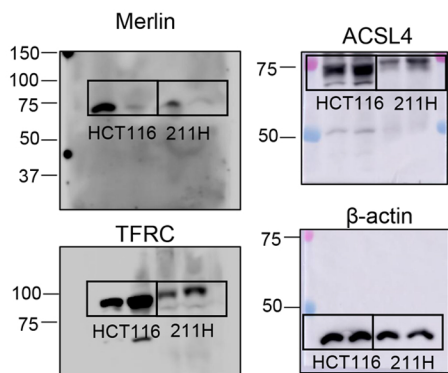

$\beta$ -actin, technical control. All four proteins were blotted using the same samples run on separate gels.

**3h**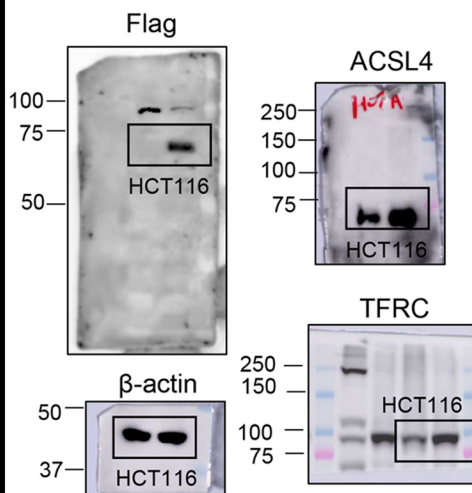

$\beta$ -actin, technical control. All four proteins were blotted using the same samples run on separate gels.

**3h (cont.)**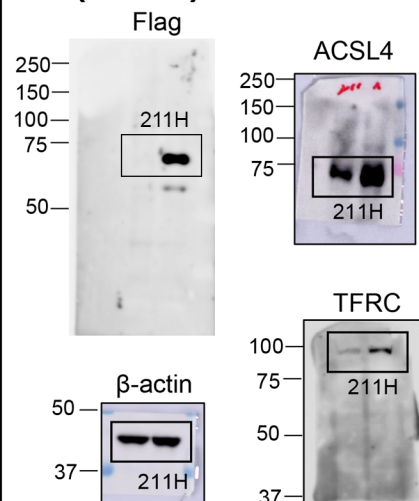

$\beta$ -actin, technical control. All four proteins were blotted using the same samples run on separate gels.

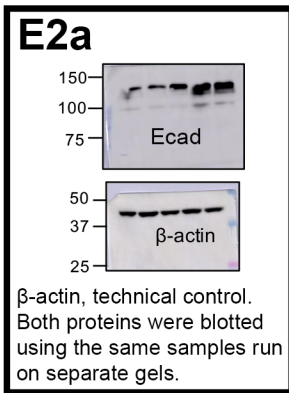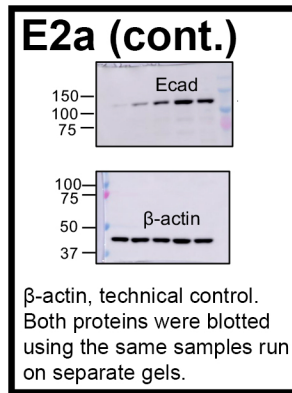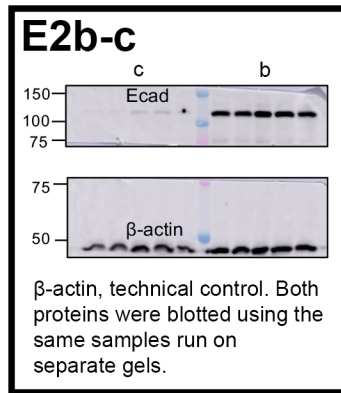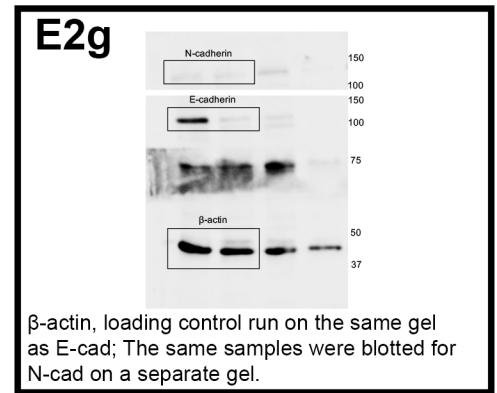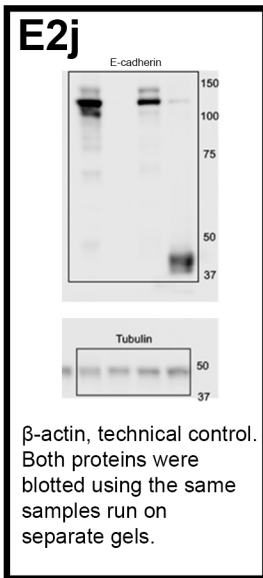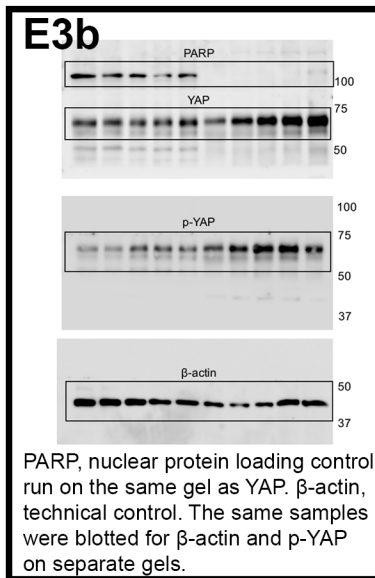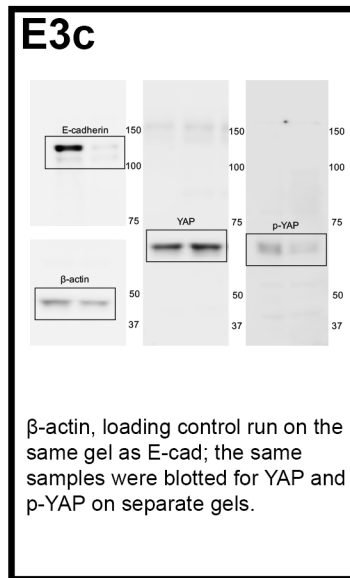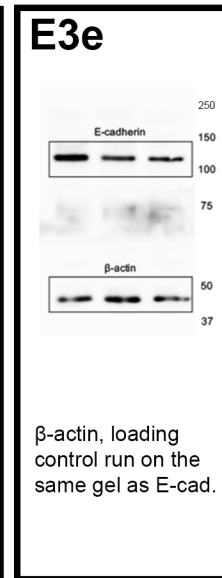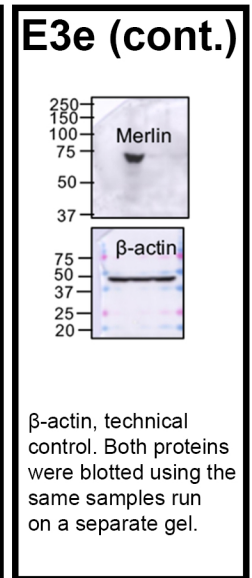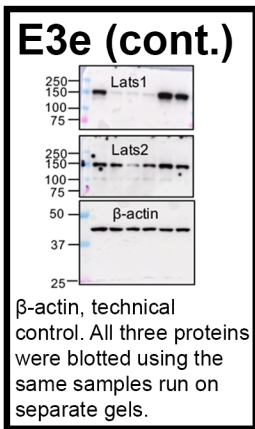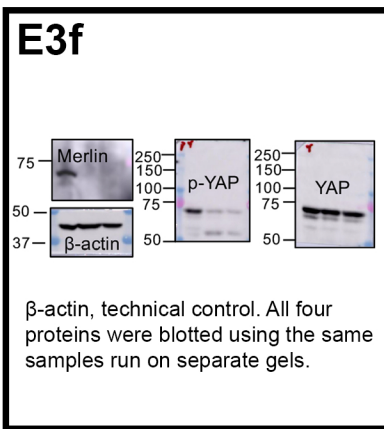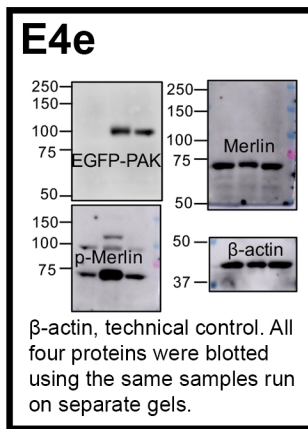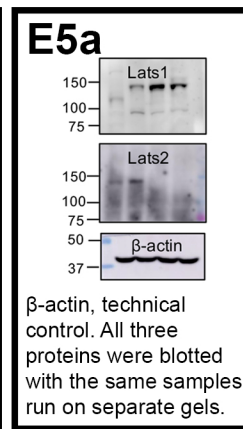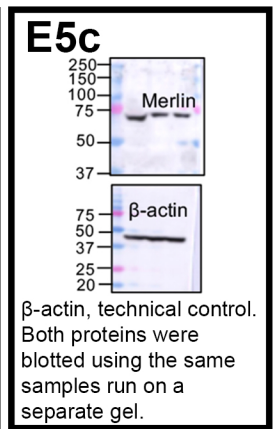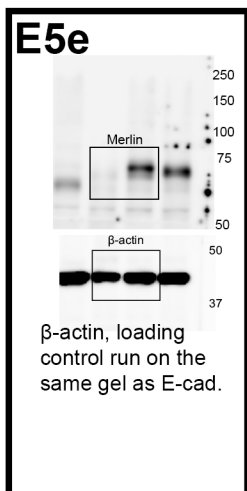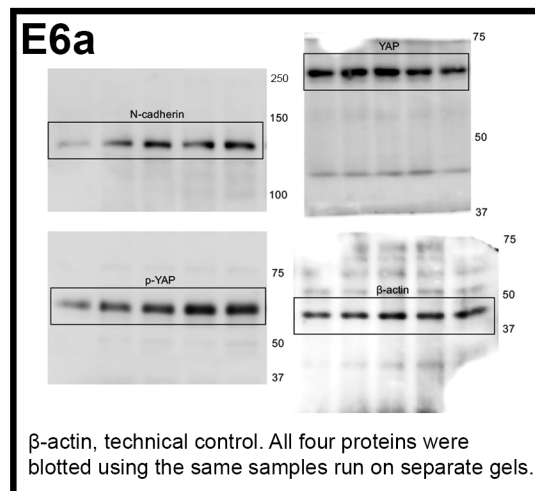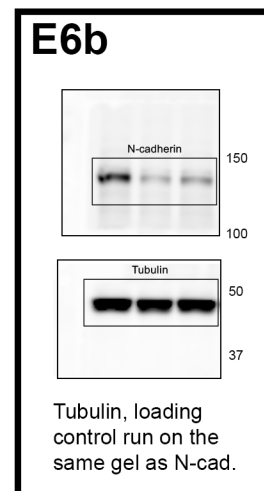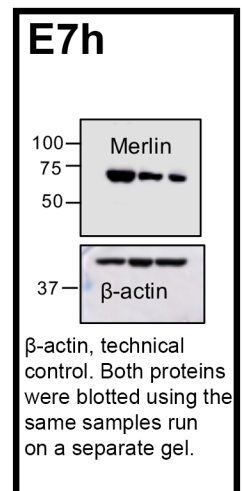

### E7I

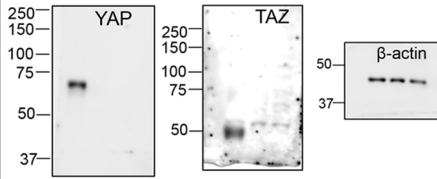

β-actin, technical control. All three proteins were blotted using the same samples run on separate gels.

### E8a

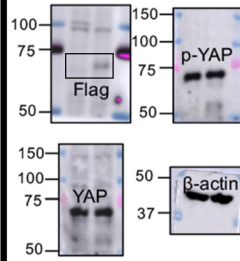

β-actin, technical control. All four proteins were blotted using the same samples run on separate gels.

### E8f

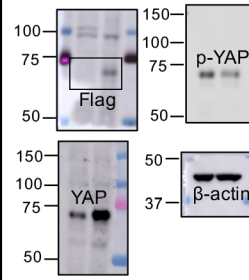

β-actin, technical control. All four proteins were blotted using the same samples run on separate gels.

### E8I

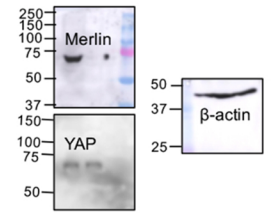

β-actin, technical control. All three proteins were blotted using the same samples run on separate gels.

### E8m

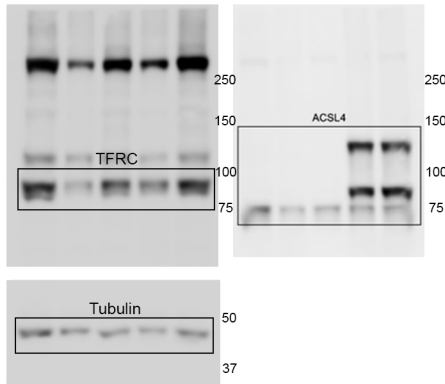

β-actin, loading control run on the same gel as TFRC; the same samples were blotted for ACSL4 on a separate gel.

### E8o

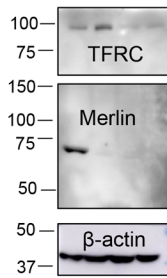

β-actin, technical control. All three proteins were blotted using the same samples run on separate gels.

### E8p

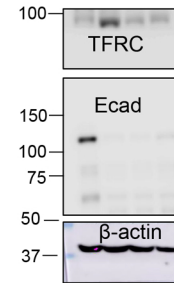

β-actin, technical control. All three proteins were blotted using the same samples run on separate gels.

### E8r

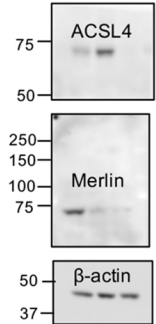

β-actin, technical control. All three proteins were blotted using the same samples run on separate gels.

### E9a

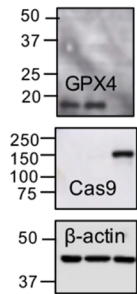

β-actin, technical control. All three proteins were blotted using the same samples run on separate gels.

### E9a (cont.)

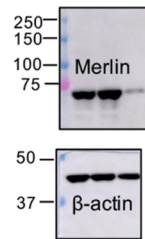

β-actin, loading control run on the same gel as Merlin.

### E10k

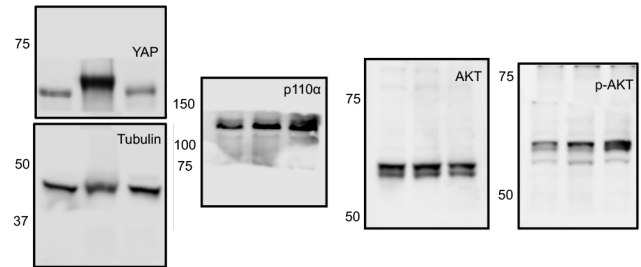

Tubulin, loading control run on the same gel as YAP. The same samples were blotted for p110α, AKT, and p-AKT on separate gels.
