# Supplementary material
Source: PubMed Central journal article supplement (PMC6697195)

## A Gating strategy for cell death

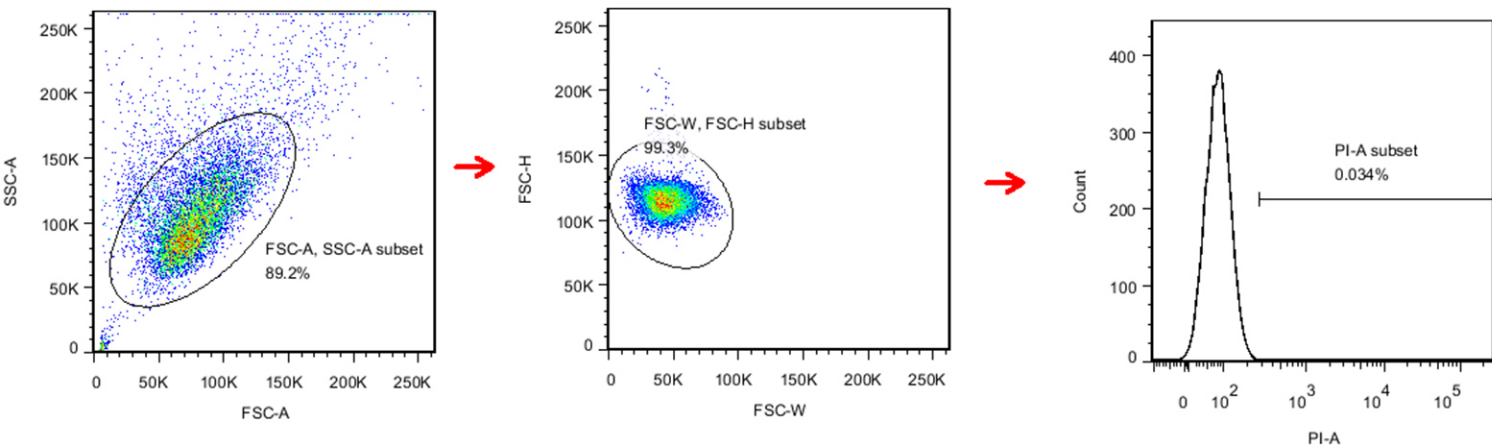

## B Gating strategy for lipid ROS

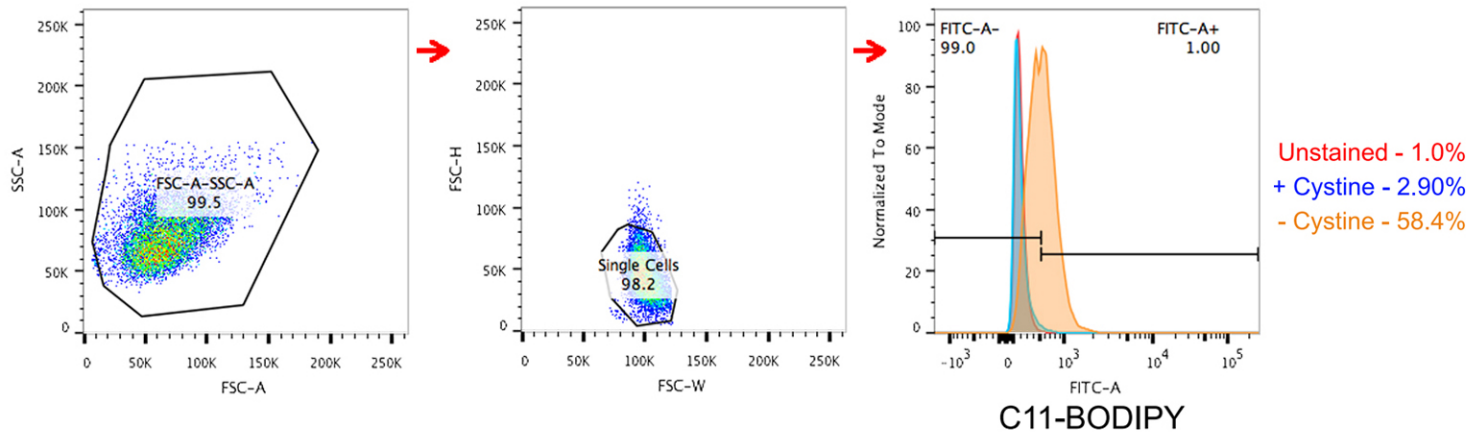

Supplement: NIHMS1533155-supplement-2.pdf [file NIHMS1533155-supplement-2.pdf]
